# Supplementary material for: Phytochemical Characterization of a Tree Tomato (Solanum betaceum Cav.) Breeding Population Grown in the Inter-Andean Valley of Ecuador
Source: MDPI journal article supplement (doi:10.3390/plants11030268), 2022-01-20
Supplement: s1 [file s1]

Table S1. Physical and chemical data of the 90 segregants of the tree tomato breeding population.

| Segregant | L     | a     | b     | TA   | SS   | SAR   | TI   | TP*   | TF*  | TC*    | TAC*   | VC*    | FRAP*  | ABTS*  |
|-----------|-------|-------|-------|------|------|-------|------|-------|------|--------|--------|--------|--------|--------|
| 1         | 75.55 | 10.39 | 47.5  | 1.12 | 11.2 | 10.00 | 1.62 | 6.65  | 2.52 | 360.32 | 1.06   | 98.22  | 58.38  | 55.78  |
| 2         | 73.42 | 8.65  | 47.03 | 0.99 | 11.5 | 11.62 | 1.57 | 7.45  | 3.25 | 412.58 | 2.93   | 78.29  | 82.19  | 71.24  |
| 3         | 74.78 | 10.08 | 49.22 | 0.92 | 10.9 | 11.85 | 1.51 | 6.20  | 1.60 | 316.19 | n.d.   | 163.09 | 62.60  | 54.78  |
| 4         | 58.78 | 12.05 | 32.19 | 1.26 | 11.8 | 9.37  | 1.73 | 9.65  | 2.47 | 454.95 | 74.02  | 289.54 | 84.98  | 88.82  |
| 5         | 50.49 | 19.11 | 20.82 | 1.63 | 11.3 | 6.93  | 1.98 | 8.66  | 1.64 | 384.92 | 107.92 | 364.59 | 74.72  | 69.73  |
| 6         | 35.20 | 12.63 | 7.56  | 1.11 | 11.9 | 10.72 | 1.65 | 12.28 | 3.20 | 342.15 | 240.49 | 251.53 | 119.7  | 131.79 |
| 7         | 49.97 | 17.9  | 21.01 | 1.49 | 12.0 | 8.05  | 1.89 | 10.55 | 2.87 | 445.43 | 116.52 | 397.62 | 90.75  | 89.74  |
| 8         | 70.63 | 14.4  | 53.76 | 0.86 | 12.1 | 14.07 | 1.56 | 8.85  | 2.23 | 442.12 | 5.54   | 219.71 | 82.02  | 82.32  |
| 9         | 59.64 | 14.83 | 31.08 | 1.16 | 12.2 | 10.52 | 1.69 | 8.3   | 2.22 | 318.46 | 57.00  | 274.78 | 78.81  | 82.23  |
| 10        | 53.61 | 12.35 | 25.62 | 1.41 | 11.9 | 8.44  | 1.83 | 11.63 | 5.67 | 345.18 | 93.87  | 243.22 | 144.52 | 100.28 |
| 11        | 55.78 | 13.22 | 21.33 | 1.18 | 11.8 | 10.00 | 1.68 | 9.39  | 4.39 | 265.52 | 94.09  | 231.60 | 94.88  | 89.36  |
| 12        | 72.38 | 12.33 | 47.90 | 1.45 | 11.5 | 7.93  | 1.85 | 7.29  | 2.19 | 283.69 | 7.94   | 294.59 | 70.18  | 54.15  |
| 13        | 51.69 | 16.70 | 20.15 | 1.63 | 12.6 | 7.73  | 2.02 | 9.98  | 2.44 | 406.08 | 119.5  | 374.90 | 98.02  | 78.07  |
| 14        | 51.75 | 9.52  | 22.52 | 1.23 | 11.4 | 9.27  | 1.69 | 11.76 | 4.03 | 459.26 | 99.19  | 324.89 | 115.36 | 95.05  |
| 15        | 56.72 | 14.31 | 26.69 | 1.60 | 11.4 | 7.13  | 1.96 | 10.04 | 2.90 | 279.87 | 76.83  | 428.16 | 102.13 | 73.42  |
| 16        | 73.91 | 8.90  | 48.53 | 1.47 | 10.6 | 7.21  | 1.83 | 6.36  | 2.50 | 225.60 | 4.25   | 176.62 | 73.39  | 51.05  |
| 17        | 72.28 | 11.08 | 49.89 | 1.25 | 12.1 | 9.68  | 1.73 | 7.11  | 1.77 | 243.47 | 6.02   | 174.84 | 82.19  | 54.42  |
| 18        | 70.48 | 11.21 | 48.13 | 1.28 | 12.1 | 9.45  | 1.75 | 6.47  | 2.15 | 241.37 | 3.01   | 164.88 | 81.24  | 49.51  |
| 19        | 73.44 | 9.89  | 48.98 | 1.09 | 12.5 | 11.47 | 1.66 | 7.23  | 1.67 | 241.92 | 4.71   | 168.23 | 79.34  | 78.27  |
| 20        | 71.00 | 7.03  | 41.35 | 1.12 | 11.6 | 10.36 | 1.64 | 5.11  | 1.54 | 284.27 | 5.84   | 143.25 | 52.43  | 61.72  |
| 21        | 72.14 | 9.68  | 49.15 | 1.06 | 12.6 | 11.89 | 1.65 | 8.19  | 2.25 | 367.21 | 4.92   | 184.82 | 93.53  | 90.80  |
| 22        | 69.90 | 14.81 | 55.99 | 0.76 | 12.9 | 16.97 | 1.61 | 8.79  | 1.96 | 460.72 | 5.18   | 184.74 | 94.24  | 88.77  |
| 23        | 74.71 | 9.17  | 48.63 | 1.38 | 11.7 | 8.48  | 1.80 | 8.05  | 2.60 | 359.89 | 3.82   | 176.53 | 84.07  | 83.89  |
| 24        | 73.35 | 11.32 | 51.56 | 1.32 | 12.1 | 9.17  | 1.78 | 8.54  | 1.98 | 338.49 | 3.51   | 299.58 | 87.25  | 79.43  |
| 25        | 73.24 | 9.68  | 52.98 | 1.42 | 11.8 | 8.31  | 1.84 | 6.67  | 2.32 | 406.00 | 6.54   | 174.73 | 72.63  | 78.16  |
| 26        | 72.35 | 10.85 | 51.19 | 1.63 | 11.9 | 7.30  | 2.00 | 8.59  | 2.70 | 386.22 | 4.56   | 329.71 | 95.50  | 76.55  |
| 27        | 70.80 | 11.73 | 53.68 | 1.26 | 12.1 | 9.60  | 1.74 | 8.62  | 2.41 | 348.82 | 5.92   | 311.13 | 88.78  | 71.66  |
| 28        | 74.84 | 9.58  | 49.97 | 1.37 | 11.7 | 8.54  | 1.80 | 7.01  | 1.67 | 230.96 | 3.51   | 247.99 | 70.37  | 55.13  |

Continuation Table S1.

| Segregant | L     | a     | b     | TA   | SS   | SAR   | TI   | TP*   | TF*  | TC*    | TAC*   | VC     | FRAP*  | ABTS*  |
|-----------|-------|-------|-------|------|------|-------|------|-------|------|--------|--------|--------|--------|--------|
| 29        | 72.35 | 11.33 | 51.04 | 1.00 | 12.0 | 12.00 | 1.60 | 7.28  | 2.45 | 460.35 | 5.30   | 134.87 | 76.95  | 66.75  |
| 30        | 73.26 | 10.09 | 48.42 | 0.95 | 11.7 | 12.32 | 1.57 | 8.59  | 2.77 | 363.74 | 3.83   | 176.50 | 99.02  | 80.30  |
| 31        | 77.35 | 6.74  | 45.70 | 1.44 | 11.2 | 7.78  | 1.83 | 6.19  | 2.81 | 311.59 | 4.73   | 213.15 | 61.67  | 49.76  |
| 32        | 73.38 | 11.08 | 47.05 | 1.01 | 11.6 | 11.49 | 1.58 | 6.53  | 2.52 | 225.79 | 4.64   | 226.40 | 75.32  | 55.06  |
| 33        | 68.11 | 11.43 | 47.58 | 1.44 | 12.0 | 8.33  | 1.86 | 5.66  | 2.59 | 297.24 | 6.87   | 196.47 | 65.43  | 49.71  |
| 34        | 70.34 | 9.58  | 41.20 | 1.40 | 12.0 | 8.57  | 1.83 | 6.46  | 2.97 | 235.64 | 4.95   | 139.79 | 72.38  | 57.19  |
| 35        | 65.63 | 10.09 | 37.07 | 1.24 | 11.5 | 9.27  | 1.70 | 8.96  | 5.29 | 221.82 | 39.31  | 158.28 | 101.29 | 85.80  |
| 36        | 73.54 | 9.22  | 46.05 | 0.68 | 11.5 | 16.91 | 1.53 | 7.89  | 4.53 | 280.82 | 5.10   | 134.84 | 96.83  | 76.98  |
| 37        | 67.38 | 7.99  | 44.88 | 0.81 | 11.9 | 14.69 | 1.54 | 8.09  | 4.53 | 214.78 | 10.96  | 107.45 | 93.03  | 73.78  |
| 38        | 72.76 | 6.51  | 39.64 | 1.19 | 10.6 | 8.91  | 1.64 | 8.93  | 4.74 | 202.67 | 3.11   | 86.65  | 106.12 | 74.71  |
| 39        | 72.53 | 7.43  | 42.01 | 1.08 | 11.2 | 10.37 | 1.60 | 6.65  | 2.88 | 238.76 | 6.15   | 107.40 | 89.29  | 65.39  |
| 40        | 74.23 | 10.10 | 50.38 | 0.84 | 11.2 | 13.33 | 1.51 | 7.68  | 3.40 | 337.88 | 1.86   | 89.98  | 100.02 | 68.72  |
| 41        | 71.85 | 8.62  | 46.99 | 0.93 | 11.2 | 12.04 | 1.53 | 8.53  | 3.48 | 260.42 | 5.42   | 99.15  | 102.98 | 73.10  |
| 42        | 69.33 | 8.98  | 46.39 | 1.08 | 11.7 | 10.83 | 1.62 | 10.53 | 6.70 | 385.19 | 3.55   | 97.46  | 113.53 | 89.04  |
| 43        | 68.96 | 6.30  | 39.03 | 1.09 | 11.2 | 10.28 | 1.60 | 7.54  | 3.97 | 253.86 | 4.80   | 93.28  | 75.64  | 66.00  |
| 44        | 70.40 | 8.90  | 40.54 | 1.02 | 11.4 | 11.18 | 1.58 | 9.40  | 4.89 | 288.91 | 12.25  | 176.44 | 120.79 | 86.90  |
| 45        | 76.16 | 4.86  | 41.08 | 1.10 | 10.9 | 9.91  | 1.60 | 7.39  | 4.26 | 185.59 | 4.22   | 213.11 | 94.39  | 84.07  |
| 46        | 75.81 | 6.91  | 42.36 | 1.32 | 11.6 | 8.79  | 1.76 | 7.50  | 4.37 | 162.14 | 3.14   | 141.50 | 96.70  | 82.89  |
| 47        | 36.30 | 13.64 | 4.19  | 0.97 | 11.9 | 12.27 | 1.58 | 13.42 | 6.40 | 219.43 | 223.61 | 256.38 | 169.61 | 125.65 |
| 48        | 33.54 | 13.69 | 3.65  | 1.10 | 12.0 | 10.91 | 1.65 | 12.23 | 4.69 | 157.28 | 237.28 | 349.65 | 158.16 | 119.99 |
| 49        | 47.55 | 9.79  | 11.83 | 0.93 | 11.6 | 12.47 | 1.55 | 10.41 | 5.26 | 270.11 | 133.97 | 153.08 | 139.10 | 90.17  |
| 50        | 71.36 | 9.59  | 44.56 | 0.99 | 11.6 | 11.72 | 1.58 | 8.86  | 4.25 | 180.72 | 4.57   | 138.06 | 117.62 | 72.06  |
| 51        | 61.62 | 4.44  | 38.59 | 1.27 | 8.5  | 6.69  | 1.60 | 6.03  | 3.38 | 79.30  | 37.81  | 159.47 | 229.31 | 160.68 |
| 52        | 72.34 | 9.65  | 49.55 | 0.97 | 9.0  | 9.28  | 1.43 | 6.50  | 2.30 | 94.25  | 35.10  | 131.54 | 251.30 | 156.63 |
| 53        | 47.55 | 6.01  | 34.72 | 1.32 | 9.0  | 6.82  | 1.66 | 8.83  | 3.15 | 76.06  | 47.81  | 193.05 | 322.29 | 205.23 |
| 54        | 68.52 | 8.17  | 43.56 | 0.90 | 9.1  | 10.11 | 1.41 | 6.23  | 2.55 | 78.53  | 47.46  | 104.68 | 218.36 | 147.83 |
| 55        | 68.03 | 9.20  | 44.06 | 1.05 | 8.5  | 8.10  | 1.45 | 7.55  | 2.86 | 128.14 | 68.09  | 158.7  | 283.61 | 173.12 |

Continuation Table S1.

| Segregant | L     | a     | B     | TA   | SS   | SAR   | TI   | TP*   | TF*  | TC*    | TAC*  | VC     | FRAP*  | ABTS*  |
|-----------|-------|-------|-------|------|------|-------|------|-------|------|--------|-------|--------|--------|--------|
| 56        | 65.57 | 10.89 | 46.96 | 0.97 | 10.1 | 10.41 | 1.49 | 6.27  | 2.47 | 50.39  | 26.17 | 180.09 | 223.70 | 133.29 |
| 57        | 59.49 | 10.25 | 31.41 | 1.00 | 8.5  | 8.50  | 1.43 | 8.05  | 2.46 | 191.25 | 39.03 | 369.60 | 253.32 | 181.87 |
| 58        | 52.73 | 7.22  | 35.53 | 1.39 | 9.9  | 7.12  | 1.75 | 8.90  | 2.81 | 124.22 | 59.63 | 260.62 | 293.28 | 207.39 |
| 59        | 55.97 | 5.82  | 38.14 | 1.16 | 9.0  | 7.76  | 1.55 | 8.65  | 3.51 | 138.50 | 48.37 | 227.79 | 258.55 | 217.02 |
| 60        | 54.24 | 10.22 | 32.40 | 1.17 | 9.6  | 8.21  | 1.58 | 8.28  | 2.67 | 104.99 | 39.03 | 253.22 | 269.28 | 207.51 |
| 61        | 56.99 | 7.68  | 31.50 | 1.35 | 9.2  | 6.81  | 1.69 | 9.64  | 3.06 | 101.11 | 20.00 | 254.14 | 283.99 | 219.36 |
| 62        | 54.01 | 6.65  | 35.78 | 1.27 | 8.5  | 6.69  | 1.60 | 9.24  | 3.46 | 119.90 | 52.33 | 237.68 | 308.25 | 197.67 |
| 63        | 67.4  | 5.31  | 44.31 | 0.81 | 10.0 | 12.35 | 1.43 | 9.39  | 2.98 | 137.36 | 39.12 | 190.76 | 272.32 | 204.56 |
| 64        | 71.36 | 12.41 | 51.15 | 0.90 | 10.9 | 12.11 | 1.51 | 6.19  | 1.47 | 140.53 | 37.93 | 175.14 | 222.02 | 135.59 |
| 65        | 67.93 | 9.87  | 47.57 | 0.70 | 9.5  | 13.57 | 1.38 | 5.82  | 1.53 | 87.91  | 28.25 | 171.62 | 201.00 | 149.83 |
| 66        | 59.39 | 4.79  | 39.94 | 1.02 | 8.1  | 7.94  | 1.42 | 5.77  | 1.83 | 61.57  | 39.11 | 135.40 | 241.32 | 136.22 |
| 67        | 72.67 | 4.99  | 47.78 | 0.76 | 10.0 | 13.16 | 1.42 | 9.67  | 2.54 | 103.74 | 41.48 | 196.37 | 290.91 | 239.75 |
| 68        | 69.02 | 7.20  | 51.49 | 0.74 | 9.8  | 13.24 | 1.40 | 11.16 | 2.87 | 121.72 | 56.90 | 225.05 | 312.14 | 281.37 |
| 69        | 64.81 | 7.04  | 45.78 | 1.09 | 9.1  | 8.35  | 1.51 | 7.51  | 2.02 | 123.00 | 10.56 | 207.23 | 233.04 | 170.10 |
| 70        | 65.54 | 3.12  | 45.47 | 0.96 | 7.9  | 8.23  | 1.37 | 8.81  | 3.24 | 100.67 | 41.27 | 225.83 | 282.81 | 213.27 |
| 71        | 56.98 | 9.49  | 39.28 | 0.85 | 9.7  | 11.41 | 1.42 | 11.25 | 2.81 | 145.25 | 42.82 | 227.85 | 260.06 | 275.78 |
| 72        | 58.19 | 8.50  | 43.68 | 1.12 | 9.0  | 8.04  | 1.52 | 10.34 | 3.57 | 213.10 | 40.37 | 235.10 | 274.35 | 213.25 |
| 73        | 67.57 | 5.22  | 48.22 | 1.23 | 9.1  | 7.40  | 1.60 | 10.66 | 3.21 | 106.40 | 44.63 | 213.33 | 282.29 | 211.82 |
| 74        | 61.57 | 9.42  | 41.37 | 0.93 | 9.2  | 9.89  | 1.42 | 7.31  | 1.24 | 94.87  | 34.67 | 210.12 | 186.44 | 157.98 |
| 75        | 69.68 | 9.56  | 48.21 | 0.97 | 10.0 | 10.31 | 1.49 | 9.80  | 3.18 | 122.51 | 58.24 | 180.83 | 273.81 | 205.79 |
| 76        | 68.26 | 11.34 | 49.75 | 1.12 | 9.9  | 8.84  | 1.56 | 8.26  | 2.20 | 119.03 | 34.14 | 228.57 | 223.66 | 167.43 |
| 77        | 71.50 | 9.70  | 47.50 | 1.37 | 10.0 | 7.30  | 1.73 | 7.25  | 2.22 | 134.17 | 23.99 | 210.14 | 239.58 | 151.08 |
| 78        | 60.47 | 5.39  | 41.05 | 1.50 | 9.1  | 6.07  | 1.80 | 8.43  | 2.21 | 108.70 | 36.44 | 192.67 | 258.67 | 184.27 |
| 79        | 70.31 | 10.80 | 49.52 | 1.14 | 10.0 | 8.77  | 1.58 | 8.15  | 2.27 | 152.52 | 41.57 | 328.95 | 230.28 | 176.55 |
| 80        | 70.33 | 8.62  | 47.84 | 1.11 | 10.0 | 9.01  | 1.56 | 8.30  | 2.17 | 106.50 | 22.61 | 279.93 | 209.23 | 163.32 |

Continuation Table S1.

| Segregant | L     | a     | B     | TA   | SS   | SAR   | TI   | TP*   | TF*  | TC*    | TAC*  | VC     | FRAP*  | ABTS*  |
|-----------|-------|-------|-------|------|------|-------|------|-------|------|--------|-------|--------|--------|--------|
| 81        | 52.73 | 15.50 | 26.06 | 1.42 | 10   | 7.04  | 1.77 | 7.78  | 2.28 | 140.77 | 56.27 | 250.01 | 246.93 | 163.81 |
| 82        | 74.56 | 5.56  | 44.32 | 1.07 | 9.4  | 8.79  | 1.51 | 8.31  | 2.64 | 91.77  | 21.94 | 197.37 | 229.03 | 173.41 |
| 83        | 71.07 | 9.14  | 48.86 | 1.07 | 9.3  | 8.69  | 1.50 | 10.59 | 3.25 | 130.51 | 25.12 | 269.80 | 328.83 | 223.03 |
| 84        | 65.66 | 7.77  | 44.92 | 0.71 | 7.0  | 9.86  | 1.20 | 16.59 | 6.40 | 151.59 | 46.41 | 251.66 | 361.70 | 312.30 |
| 85        | 71.19 | 5.24  | 44.52 | 1.02 | 9.6  | 9.41  | 1.49 | 9.49  | 2.71 | 112.85 | 29.93 | 227.55 | 269.63 | 218.74 |
| 86        | 72.13 | 4.66  | 43.59 | 0.95 | 9.1  | 9.58  | 1.43 | 9.57  | 2.77 | 94.74  | 20.97 | 174.38 | 274.17 | 213.98 |
| 87        | 59.04 | 5.18  | 40.18 | 0.80 | 8.2  | 10.25 | 1.31 | 8.73  | 3.20 | 77.36  | 37.07 | 165.00 | 326.22 | 191.25 |
| 88        | 71.74 | 9.37  | 50.40 | 0.92 | 8.2  | 8.91  | 1.37 | 9.49  | 2.29 | 135.33 | 35.10 | 321.44 | 273.79 | 211.58 |
| 89        | 71.64 | 8.67  | 47.36 | 1.42 | 9.1  | 6.41  | 1.74 | 5.36  | 1.91 | 114.49 | 26.24 | 165.32 | 223.59 | 166.38 |
| 90        | 64.14 | 10.46 | 40.02 | 1.02 | 10.0 | 9.80  | 1.51 | 8.09  | 2.29 | 181.86 | 44.80 | 232.50 | 227.63 | 175.12 |

L= brightness; a= coordinates red/green; b= coordinates yellow/blue; TA= titratable acidity (%); SS= soluble solids (°Brix); SAR= sugar/acidity ratio; TI= taste index; TP= total polyphenols (mg GAE g<sup>-1</sup>); TF= total flavonoids (mg cat g<sup>-1</sup>); TC= total carotenoids (µg β-carotene g<sup>-1</sup>); TAC= total anthocyanin content (gly-3-glu 100 g<sup>-1</sup>); VC= vitamin C (mg 100 g<sup>-1</sup>); FRAP= antioxidant capacity FRAP method (µm Trolox g<sup>-1</sup>); ABTS= antioxidant capacity ABTS method (µm Trolox g<sup>-1</sup>); n.d.= not detected.

\*Parameters are given per dry weight.

Table S2. Partial correlation between the chemical traits of tree tomato pulp. Bold means statistical significance ( $p < 0.001$ ).

|      | TP           | TF            | FRAP          | ABTS   | TAC    | TC     | VC     | TA            | SS     | SAR          | TI |
|------|--------------|---------------|---------------|--------|--------|--------|--------|---------------|--------|--------------|----|
| TP   | 1            |               |               |        |        |        |        |               |        |              |    |
| TF   | <b>0,80</b>  | 1             |               |        |        |        |        |               |        |              |    |
| FRAP | -0,063       | 0,069         | 1             |        |        |        |        |               |        |              |    |
| ABTS | <b>0,534</b> | <b>-0,409</b> | <b>0,724</b>  | 1      |        |        |        |               |        |              |    |
| TAC  | <b>0,329</b> | -0,042        | 0,166         | -0,216 | 1      |        |        |               |        |              |    |
| TC   | <b>0,471</b> | <b>-0,303</b> | <b>-0,306</b> | -0,112 | -0,208 | 1      |        |               |        |              |    |
| VC   | <b>0,496</b> | <b>-0,549</b> | 0,010         | -0,080 | 0,202  | -0,027 | 1      |               |        |              |    |
| TA   | 0,124        | -0,057        | 0,134         | -0,093 | -0,064 | 0,048  | -0,220 | 1             |        |              |    |
| SS   | 0,247        | -0,158        | <b>-0,317</b> | -0,113 | 0,121  | -0,072 | -0,093 | 0,110         | 1      |              |    |
| SAR  | 0,119        | -0,055        | 0,139         | -0,088 | -0,067 | 0,057  | -0,222 | <b>-0,998</b> | 0,159  | 1            |    |
| TI   | -0,134       | 0,062         | -0,128        | 0,093  | 0,062  | -0,040 | 0,232  | <b>0,998</b>  | -0,069 | <b>0,993</b> | 1  |

TP= total polyphenols; TF= total flavonoids; FRAP= antioxidant capacity FRAP method; ABTS= antioxidant capacity ABTS method; TC= total carotenoids; TAC= total anthocyanin content; VC= vitamin C; TA= titratable acidity; SS= soluble solids; SAR= sugar/acidity ratio; TI= taste index.
